# Supplementary material for: Healthy apple program to support child care centers to alter nutrition and physical activity practices and improve child weight: a cluster randomized trial
Source: Springer Nature journal article supplement (doi:10.1186/s12889-017-4951-y), 2017-12-01
Supplement: MOESM2 [file 15356100]

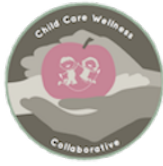

# Healthy Apple Award

Excellence in Nutrition, Physical Activity, & Screen Time  
in Child Care Environments

## Goal Setting Worksheet

Provider Name: \_\_\_\_\_ Date: \_\_\_\_\_

|                                                     |           |                   |                    |      |
|-----------------------------------------------------|-----------|-------------------|--------------------|------|
| Healthy Apple Award Level: <i>Nutrition</i>         | None      | Bronze            | Silver             | Gold |
| Healthy Apple Award Level: <i>Physical Activity</i> | None      | Bronze            | Silver             | Gold |
| Healthy Apple Award Level: <i>Screen Time</i>       | None      | Bronze            | Silver             | Gold |
| Key Focus Area for Improvement                      | Nutrition | Physical Activity | Screen Time        |      |
| Best Practice for Improvement (1)                   |           |                   |                    |      |
| Action Plan                                         |           |                   |                    |      |
| Date of Completion                                  |           |                   | Staff Responsible: |      |
| Best Practice for Improvement (2)                   |           |                   |                    |      |
| Action Plan                                         |           |                   |                    |      |
| Date of Completion                                  |           |                   | Staff Responsible: |      |
| Workshop to Attend                                  |           |                   |                    |      |
