# Supplementary material for: Healthy apple program to support child care centers to alter nutrition and physical activity practices and improve child weight: a cluster randomized trial
Source: Springer Nature journal article supplement (doi:10.1186/s12889-017-4951-y), 2017-12-01
Supplement: MOESM5 [file 15356100]

## Example Healthy Apple Program Consultant Guide

Consultant:

Provider Name:

Facility Name:

Type of Child Care: *Center*

Number of Children Enrolled:

Current Award Levels:      N – *None*      PA – *None*      **ST – *Gold***

| Target Best Practice                                                                                                                    | Current Score & Description   | Next Step Up                  | Tip Sheet Page # |
|-----------------------------------------------------------------------------------------------------------------------------------------|-------------------------------|-------------------------------|------------------|
| Offer beans or lean meats (baked or broiled chicken, turkey, or fish): <i>1 or more times per day.</i>                                  | (1) Less than 1 time per week | (2) 1-2 times per week        | 5                |
| Structured (or teacher-led) activities are provided to all children, including those with special needs: <i>2 or more times per day</i> | (1) 1 time per week           | (2) 2-4 times per week        | 14               |
| Offer staff training in child physical activity (in addition to playground safety): <i>2 times per year or more</i>                     | (1) Rarely or never           | (2) Less than 1 time per year | 18               |
| Offer parents child physical activity education (e.g., special programs, newsletters, information sheets): <i>2 times per year</i>      | (1) Rarely or never           | (2) Less than 1 time per year | 18               |
